# Supplementary material for: A Cooperative Photoactive Class-I Hybrid Polyoxometalate With Benzothiadiazole–Imidazolium Cations
Source: Front Chem. 2021 Jan 14;8:612535. doi: 10.3389/fchem.2020.612535 (PMC7841050; doi:10.3389/fchem.2020.612535)

# checkCIF/PLATON report

Structure factors have been supplied for datablock(s) I

THIS REPORT IS FOR GUIDANCE ONLY. IF USED AS PART OF A REVIEW PROCEDURE FOR PUBLICATION, IT SHOULD NOT REPLACE THE EXPERTISE OF AN EXPERIENCED CRYSTALLOGRAPHIC REFEREE.

No syntax errors found.      CIF dictionary      Interpreting this report

## Datablock: I

---

Bond precision:    C-C = 0.0433 A

Wavelength=1.54184

Cell:                    a=14.0842(6)                    b=20.2347(9)                    c=21.3071(7)  
                          alpha=91.830(3)        beta=105.314(4)        gamma=91.440(4)  
Temperature:    120 K

|                | Calculated                                            | Reported                                  |
|----------------|-------------------------------------------------------|-------------------------------------------|
| Volume         | 5850.2(4)                                             | 5850.2(4)                                 |
| Space group    | P -1                                                  | P -1                                      |
| Hall group     | -P 1                                                  | -P 1                                      |
| Moiety formula | O62 P2 W18, 3(C12 H10 N6 S), 3(C3 H7 N O) [+ solvent] | O62 P2 W18, 3(C12 H10 N6 S), 3(C3 H7 N O) |
| Sum formula    | C45 H51 N21 O65 P2 S3 W18 [+ solvent]                 | C69 H107 N29 O73 P2 S3 W18                |
| Mr             | 5393.31                                               | 5978.25                                   |
| Dx,g cm-3      | 3.062                                                 | 3.394                                     |
| Z              | 2                                                     | 2                                         |
| Mu (mm-1)      | 33.282                                                | 33.488                                    |
| F000           | 4796.0                                                | 5436.0                                    |
| F000'          | 4614.21                                               |                                           |
| h,k,lmax       | 16,24,25                                              | 16,24,25                                  |
| Nref           | 20679                                                 | 20405                                     |
| Tmin,Tmax      | 0.438,0.692                                           | 0.202,0.724                               |
| Tmin'          | 0.031                                                 |                                           |

Correction method= # Reported T Limits: Tmin=0.202 Tmax=0.724  
AbsCorr = GAUSSIAN

Data completeness= 0.987

Theta(max)= 66.601

R(reflections)= 0.0961( 12360)

wR2(reflections)= 0.3108( 20405)

S = 1.062

Npar= 1392

---

The following ALERTS were generated. Each ALERT has the format  
**test-name\_ALERT\_alert-type\_alert-level**.  
Click on the hyperlinks for more details of the test.

---

### Alert level A

PLAT973\_ALERT\_2\_A Check Calcd Positive Resid. Density on W11 3.46 eA-3

**Author Response:** The X-ray diffraction intensity of the large anionic polyoxometalate was weak and dropped off at high angle with a diffraction limit of 1.1 Å. Many large residual electron density peaks are located close to the tungsten atoms (range 0.9-1.9 Å) likely as a result of deficiencies in the absorption correction and ellipsoid model for the atomic displacement.

PLAT973\_ALERT\_2\_A Check Calcd Positive Resid. Density on W6 3.14 eA-3

**Author Response:** The X-ray diffraction intensity of the large anionic polyoxometalate was weak and dropped off at high angle with a diffraction limit of 1.1 Å. Many large residual electron density peaks are located close to the tungsten atoms (range 0.9-1.9 Å) likely as a result of deficiencies in the absorption correction and ellipsoid model for the atomic displacement.

---

### Alert level B

PLAT342\_ALERT\_3\_B Low Bond Precision on C-C Bonds ..... 0.04333 Ång.

**Author Response:** The X-ray diffraction intensity of the large anionic polyoxometalate was weak and dropped off at high angle with a diffraction limit of 1.1 Å. Geometric similarity restraints were applied to bond distances of the dimethylformamide solvents and 4,7-imidazolium-2,1,3-benzothiadiazole cations (SADI). Rigid bond and similarity restraints were applied to the anisotropic displacement parameters of all atoms in the structure.

PLAT990\_ALERT\_1\_B Deprecated .res/.hkl Input Style SQUEEZE Job ... ! Note

---

### Alert level C

DIFMN02\_ALERT\_2\_C The minimum difference density is < -0.1\*ZMAX\*0.75  
\_refine\_diff\_density\_min given = -6.084  
Test value = -5.550

DIFMN03\_ALERT\_1\_C The minimum difference density is < -0.1\*ZMAX\*0.75  
The relevant atom site should be identified.

RINTA01\_ALERT\_3\_C The value of Rint is greater than 0.12  
Rint given 0.131

|                   |                                                 |       |              |
|-------------------|-------------------------------------------------|-------|--------------|
| PLAT020_ALERT_3_C | The Value of Rint is Greater Than 0.12 .....    | 0.131 | Report       |
| PLAT084_ALERT_3_C | High wR2 Value (i.e. > 0.25) .....              | 0.31  | Report       |
| PLAT098_ALERT_2_C | Large Reported Min. (Negative) Residual Density | -6.08 | eA-3         |
| PLAT234_ALERT_4_C | Large Hirshfeld Difference W16 --O16 .          | 0.17  | Ång.         |
| PLAT260_ALERT_2_C | Large Average Ueq of Residue Including O6S      | 0.119 | Check        |
| PLAT260_ALERT_2_C | Large Average Ueq of Residue Including O11S     | 0.115 | Check        |
| PLAT420_ALERT_2_C | D-H Without Acceptor N37 --H37 .                |       | Please Check |
| PLAT420_ALERT_2_C | D-H Without Acceptor N52 --H52 .                |       | Please Check |

|                   |                                                  |       |   |       |        |
|-------------------|--------------------------------------------------|-------|---|-------|--------|
| PLAT480_ALERT_4_C | Long H...A H-Bond Reported H11                   | ..N2  | . | 2.71  | Ang.   |
| PLAT480_ALERT_4_C | Long H...A H-Bond Reported H18                   | ..08  | . | 2.61  | Ang.   |
| PLAT480_ALERT_4_C | Long H...A H-Bond Reported H32                   | ..012 | . | 2.70  | Ang.   |
| PLAT480_ALERT_4_C | Long H...A H-Bond Reported H25                   | ..010 | . | 2.64  | Ang.   |
| PLAT480_ALERT_4_C | Long H...A H-Bond Reported H25                   | ..047 | . | 2.84  | Ang.   |
| PLAT480_ALERT_4_C | Long H...A H-Bond Reported H26                   | ..046 | . | 2.77  | Ang.   |
| PLAT480_ALERT_4_C | Long H...A H-Bond Reported H45                   | ..044 | . | 2.73  | Ang.   |
| PLAT480_ALERT_4_C | Long H...A H-Bond Reported H46                   | ..044 | . | 2.96  | Ang.   |
| PLAT480_ALERT_4_C | Long H...A H-Bond Reported H46                   | ..050 | . | 2.83  | Ang.   |
| PLAT480_ALERT_4_C | Long H...A H-Bond Reported H5SA                  | ..053 | . | 2.62  | Ang.   |
| PLAT480_ALERT_4_C | Long H...A H-Bond Reported H10B                  | ..013 | . | 2.73  | Ang.   |
| PLAT480_ALERT_4_C | Long H...A H-Bond Reported H15B                  | ..01  | . | 2.64  | Ang.   |
| PLAT482_ALERT_4_C | Small D-H..A Angle Rep for C25                   | ..047 | . | 99.50 | Degree |
| PLAT482_ALERT_4_C | Small D-H..A Angle Rep for C45                   | ..044 | . | 99.40 | Degree |
| PLAT482_ALERT_4_C | Small D-H..A Angle Rep for C46                   | ..044 | . | 93.00 | Degree |
| PLAT482_ALERT_4_C | Small D-H..A Angle Rep for C46                   | ..050 | . | 96.50 | Degree |
| PLAT482_ALERT_4_C | Small D-H..A Angle Rep for C5S                   | ..053 | . | 92.70 | Degree |
| PLAT482_ALERT_4_C | Small D-H..A Angle Rep for C10S                  | ..013 | . | 95.70 | Degree |
| PLAT482_ALERT_4_C | Small D-H..A Angle Rep for C15S                  | ..01  | . | 97.80 | Degree |
| PLAT910_ALERT_3_C | Missing # of FCF Reflection(s) Below Theta(Min). |       |   | 6     | Note   |
| PLAT911_ALERT_3_C | Missing FCF Refl Between Thmin & STh/L=          | 0.595 |   | 268   | Report |
| PLAT923_ALERT_1_C | S Values in the CIF and FCF Differ by .....      |       |   | 0.011 | Check  |
| PLAT977_ALERT_2_C | Check Negative Difference Density on H11         |       |   | -0.65 | eA-3   |
| PLAT977_ALERT_2_C | Check Negative Difference Density on H12         |       |   | -0.74 | eA-3   |
| PLAT977_ALERT_2_C | Check Negative Difference Density on H31         |       |   | -0.43 | eA-3   |
| PLAT977_ALERT_2_C | Check Negative Difference Density on H33         |       |   | -0.60 | eA-3   |
| PLAT977_ALERT_2_C | Check Negative Difference Density on H37         |       |   | -0.54 | eA-3   |
| PLAT977_ALERT_2_C | Check Negative Difference Density on H38         |       |   | -0.55 | eA-3   |
| PLAT977_ALERT_2_C | Check Negative Difference Density on H45         |       |   | -0.60 | eA-3   |
| PLAT977_ALERT_2_C | Check Negative Difference Density on H53         |       |   | -0.59 | eA-3   |
| PLAT977_ALERT_2_C | Check Negative Difference Density on H56         |       |   | -0.60 | eA-3   |

### Alert level G

FORMU01\_ALERT\_1\_G There is a discrepancy between the atom counts in the  
 \_chemical\_formula\_sum and \_chemical\_formula\_moiety. This is  
 usually due to the moiety formula being in the wrong format.  
 Atom count from \_chemical\_formula\_sum: C69 H107 N29 O73 P2 S3 W18  
 Atom count from \_chemical\_formula\_moiety: C45 H51 N21 O65 P2 S3 W18

FORMU01\_ALERT\_2\_G There is a discrepancy between the atom counts in the  
 \_chemical\_formula\_sum and the formula from the \_atom\_site\* data.  
 Atom count from \_chemical\_formula\_sum: C69 H107 N29 O73 P2 S3 W18  
 Atom count from the \_atom\_site data: C45 H51 N21 O65 P2 S3 W18

CELLZ01\_ALERT\_1\_G Difference between formula and atom\_site contents detected.

CELLZ01\_ALERT\_1\_G ALERT: Large difference may be due to a  
 symmetry error - see SYMMG tests  
 From the CIF: \_cell\_formula\_units\_Z 2  
 From the CIF: \_chemical\_formula\_sum C69 H107 N29 O73 P2 S3 W18  
 TEST: Compare cell contents of formula and atom\_site data

| atom | Z*formula | cif sites | diff   |
|------|-----------|-----------|--------|
| C    | 138.00    | 90.00     | 48.00  |
| H    | 214.00    | 102.00    | 112.00 |
| N    | 58.00     | 42.00     | 16.00  |
| O    | 146.00    | 130.00    | 16.00  |
| P    | 4.00      | 4.00      | 0.00   |
| S    | 6.00      | 6.00      | 0.00   |
| W    | 36.00     | 36.00     | 0.00   |

|                   |                                                  |     |             |
|-------------------|--------------------------------------------------|-----|-------------|
| PLAT002_ALERT_2_G | Number of Distance or Angle Restraints on AtSite | 72  | Note        |
| PLAT003_ALERT_2_G | Number of Uiso or Uij Restrained non-H Atoms ... | 154 | Report      |
| PLAT005_ALERT_5_G | No Embedded Refinement Details Found in the CIF  |     | Please Do ! |

|                   |                                                  |        |              |
|-------------------|--------------------------------------------------|--------|--------------|
| PLAT007_ALERT_5_G | Number of Unrefined Donor-H Atoms .....          | 6      | Report       |
| PLAT041_ALERT_1_G | Calc. and Reported SumFormula Strings Differ     |        | Please Check |
| PLAT044_ALERT_1_G | Calculated and Reported Density Dx Differ by ..  | 0.3323 | Check        |
| PLAT051_ALERT_1_G | Mu(calc) and Mu(CIF) Ratio Differs from 1.0 by . | 0.61   | %            |
| PLAT068_ALERT_1_G | Reported F000 Differs from Calcd (or Missing)... |        | Please Check |
| PLAT072_ALERT_2_G | SHELXL First Parameter in WGHT Unusually Large   | 0.20   | Report       |
| PLAT380_ALERT_4_G | Incorrectly? Oriented X(sp2)-Methyl Moiety ..... |        | C5S Check    |
| PLAT380_ALERT_4_G | Incorrectly? Oriented X(sp2)-Methyl Moiety ..... |        | C9S Check    |
| PLAT432_ALERT_2_G | Short Inter X...Y Contact S21 ..C14              | 3.30   | Ang.         |
|                   | -x,1-y,2-z =                                     | 2_567  | Check        |
| PLAT432_ALERT_2_G | Short Inter X...Y Contact O1 ..C6                | 2.85   | Ang.         |
|                   | x,y,z =                                          | 1_555  | Check        |
| PLAT432_ALERT_2_G | Short Inter X...Y Contact O1 ..C15S              | 2.94   | Ang.         |
|                   | -1+x,y,z =                                       | 1_455  | Check        |
| PLAT432_ALERT_2_G | Short Inter X...Y Contact O1S ..C38              | 2.78   | Ang.         |
|                   | -x,1-y,1-z =                                     | 2_566  | Check        |
| PLAT432_ALERT_2_G | Short Inter X...Y Contact O8 ..C51               | 2.80   | Ang.         |
|                   | x,y,z =                                          | 1_555  | Check        |
| PLAT432_ALERT_2_G | Short Inter X...Y Contact O10 ..C25              | 2.99   | Ang.         |
|                   | x,y,z =                                          | 1_555  | Check        |
| PLAT432_ALERT_2_G | Short Inter X...Y Contact O13 ..C10S             | 2.98   | Ang.         |
|                   | x,y,z =                                          | 1_555  | Check        |
| PLAT432_ALERT_2_G | Short Inter X...Y Contact O13 ..C56              | 3.02   | Ang.         |
|                   | 1+x,y,z =                                        | 1_655  | Check        |
| PLAT432_ALERT_2_G | Short Inter X...Y Contact O40 ..C26              | 2.97   | Ang.         |
|                   | x,y,z =                                          | 1_555  | Check        |
| PLAT432_ALERT_2_G | Short Inter X...Y Contact O53 ..C5S              | 2.84   | Ang.         |
|                   | 1+x,y,z =                                        | 1_655  | Check        |
| PLAT606_ALERT_4_G | Solvent Accessible VOID(S) in Structure .....    |        | ! Info       |
| PLAT720_ALERT_4_G | Number of Unusual/Non-Standard Labels .....      | 9      | Note         |
| PLAT722_ALERT_1_G | Angle Calc 128.00, Rep 129.20 Dev...             | 1.20   | Degree       |
|                   | N17 -C18 -H18 1.555 1.555 1.555 # 394            |        | Check        |
| PLAT722_ALERT_1_G | Angle Calc 108.00, Rep 109.50 Dev...             | 1.50   | Degree       |
|                   | N8S -C10S -H10B 1.555 1.555 1.555 # 533          |        | Check        |
| PLAT722_ALERT_1_G | Angle Calc 111.00, Rep 109.50 Dev...             | 1.50   | Degree       |
|                   | H10A -C10S -H10C 1.555 1.555 1.555 # 536         |        | Check        |
| PLAT790_ALERT_4_G | Centre of Gravity not Within Unit Cell: Resd. #  | 4      | Note         |
|                   | C12 H10 N6 S                                     |        |              |
| PLAT790_ALERT_4_G | Centre of Gravity not Within Unit Cell: Resd. #  | 5      | Note         |
|                   | C3 H7 N O                                        |        |              |
| PLAT794_ALERT_5_G | Tentative Bond Valency for W1 (VI) .             | 5.81   | Info         |
| PLAT794_ALERT_5_G | Tentative Bond Valency for W2 (VI) .             | 5.92   | Info         |
| PLAT794_ALERT_5_G | Tentative Bond Valency for W3 (VI) .             | 6.36   | Info         |
| PLAT794_ALERT_5_G | Tentative Bond Valency for W4 (VI) .             | 6.37   | Info         |
| PLAT794_ALERT_5_G | Tentative Bond Valency for W5 (VI) .             | 6.61   | Info         |
| PLAT794_ALERT_5_G | Tentative Bond Valency for W6 (VI) .             | 6.18   | Info         |
| PLAT794_ALERT_5_G | Tentative Bond Valency for W7 (VI) .             | 5.75   | Info         |
| PLAT794_ALERT_5_G | Tentative Bond Valency for W8 (VI) .             | 6.07   | Info         |
| PLAT794_ALERT_5_G | Tentative Bond Valency for W9 (VI) .             | 6.17   | Info         |
| PLAT794_ALERT_5_G | Tentative Bond Valency for W10 (VI) .            | 5.88   | Info         |
| PLAT794_ALERT_5_G | Tentative Bond Valency for W11 (VI) .            | 6.13   | Info         |
| PLAT794_ALERT_5_G | Tentative Bond Valency for W12 (VI) .            | 6.36   | Info         |
| PLAT794_ALERT_5_G | Tentative Bond Valency for W13 (VI) .            | 6.34   | Info         |
| PLAT794_ALERT_5_G | Tentative Bond Valency for W14 (VI) .            | 6.32   | Info         |
| PLAT794_ALERT_5_G | Tentative Bond Valency for W15 (VI) .            | 6.55   | Info         |
| PLAT794_ALERT_5_G | Tentative Bond Valency for W16 (VI) .            | 6.56   | Info         |
| PLAT794_ALERT_5_G | Tentative Bond Valency for W17 (VI) .            | 6.13   | Info         |
| PLAT794_ALERT_5_G | Tentative Bond Valency for W18 (VI) .            | 6.32   | Info         |
| PLAT860_ALERT_3_G | Number of Least-Squares Restraints .....         | 2934   | Note         |
| PLAT869_ALERT_4_G | ALERTS Related to the Use of SQUEEZE Suppressed  |        | ! Info       |
| PLAT909_ALERT_3_G | Percentage of I>2sig(I) Data at Theta(Max) Still | 33%    | Note         |
| PLAT978_ALERT_2_G | Number C-C Bonds with Positive Residual Density. | 0      | Info         |

---

2 **ALERT level A** = Most likely a serious problem - resolve or explain  
2 **ALERT level B** = A potentially serious problem, consider carefully  
42 **ALERT level C** = Check. Ensure it is not caused by an omission or oversight  
54 **ALERT level G** = General information/check it is not something unexpected

13 **ALERT type 1** CIF construction/syntax error, inconsistent or missing data  
32 **ALERT type 2** Indicator that the structure model may be wrong or deficient  
8 **ALERT type 3** Indicator that the structure quality may be low  
27 **ALERT type 4** Improvement, methodology, query or suggestion  
20 **ALERT type 5** Informative message, check

---

## checkCIF publication errors

---

### **Alert level A**

PUBL004\_ALERT\_1\_A The contact author's name and address are missing,  
\_publ\_contact\_author\_name and \_publ\_contact\_author\_address.  
PUBL005\_ALERT\_1\_A \_publ\_contact\_author\_email, \_publ\_contact\_author\_fax and  
\_publ\_contact\_author\_phone are all missing.  
At least one of these should be present.  
PUBL006\_ALERT\_1\_A \_publ\_requested\_journal is missing  
e.g. 'Acta Crystallographica Section C'  
PUBL008\_ALERT\_1\_A \_publ\_section\_title is missing. Title of paper.  
PUBL009\_ALERT\_1\_A \_publ\_author\_name is missing. List of author(s) name(s).  
PUBL010\_ALERT\_1\_A \_publ\_author\_address is missing. Author(s) address(es).  
PUBL012\_ALERT\_1\_A \_publ\_section\_abstract is missing.  
Abstract of paper in English.

---

7 **ALERT level A** = Data missing that is essential or data in wrong format  
0 **ALERT level G** = General alerts. Data that may be required is missing

---

### Publication of your CIF

You should attempt to resolve as many as possible of the alerts in all categories. Often the minor alerts point to easily fixed oversights, errors and omissions in your CIF or refinement strategy, so attention to these fine details can be worthwhile. In order to resolve some of the more serious problems it may be necessary to carry out additional measurements or structure refinements. However, the nature of your study may justify the reported deviations from journal submission requirements and the more serious of these should be commented upon in the discussion or experimental section of a paper or in the "special\_details" fields of the CIF. *checkCIF* was carefully designed to identify outliers and unusual parameters, but every test has its limitations and alerts that are not important in a particular case may appear. Conversely, the absence of alerts does not guarantee there are no aspects of the results needing attention. It is up to the individual to critically assess their own results and, if necessary, seek expert advice.

If level A alerts remain, which you believe to be justified deviations, and you intend to submit this CIF for publication in a journal, you should additionally insert an explanation in your CIF using the Validation Reply Form (VRF) below. This will allow your explanation to be considered as part of the review process.

## Validation response form

Please find below a validation response form (VRF) that can be filled in and pasted into your CIF.

```
# start Validation Reply Form
_vrf_PUBL004_GLOBAL
;
PROBLEM: The contact author's name and address are missing,
RESPONSE: ...
;
_vrf_PUBL005_GLOBAL
;
PROBLEM: _publ_contact_author_email, _publ_contact_author_fax and
RESPONSE: ...
;
_vrf_PUBL006_GLOBAL
;
PROBLEM: _publ_requested_journal is missing
RESPONSE: ...
;
_vrf_PUBL008_GLOBAL
;
PROBLEM: _publ_section_title is missing. Title of paper.
RESPONSE: ...
;
_vrf_PUBL009_GLOBAL
;
PROBLEM: _publ_author_name is missing. List of author(s) name(s).
RESPONSE: ...
;
_vrf_PUBL010_GLOBAL
;
PROBLEM: _publ_author_address is missing. Author(s) address(es).
RESPONSE: ...
;
_vrf_PUBL012_GLOBAL
;
PROBLEM: _publ_section_abstract is missing.
RESPONSE: ...
;
# end Validation Reply Form
```

If you wish to submit your CIF for publication in Acta Crystallographica Section C or E, you should upload your CIF via the web. If you wish to submit your CIF for publication in IUCrData you should upload your CIF via the web. If your CIF is to form part of a submission to another IUCr journal, you will be asked, either during electronic submission or by the Co-editor handling your paper, to upload your CIF via our web site.

---

**PLATON version of 10/08/2020; check.def file version of 06/08/2020**

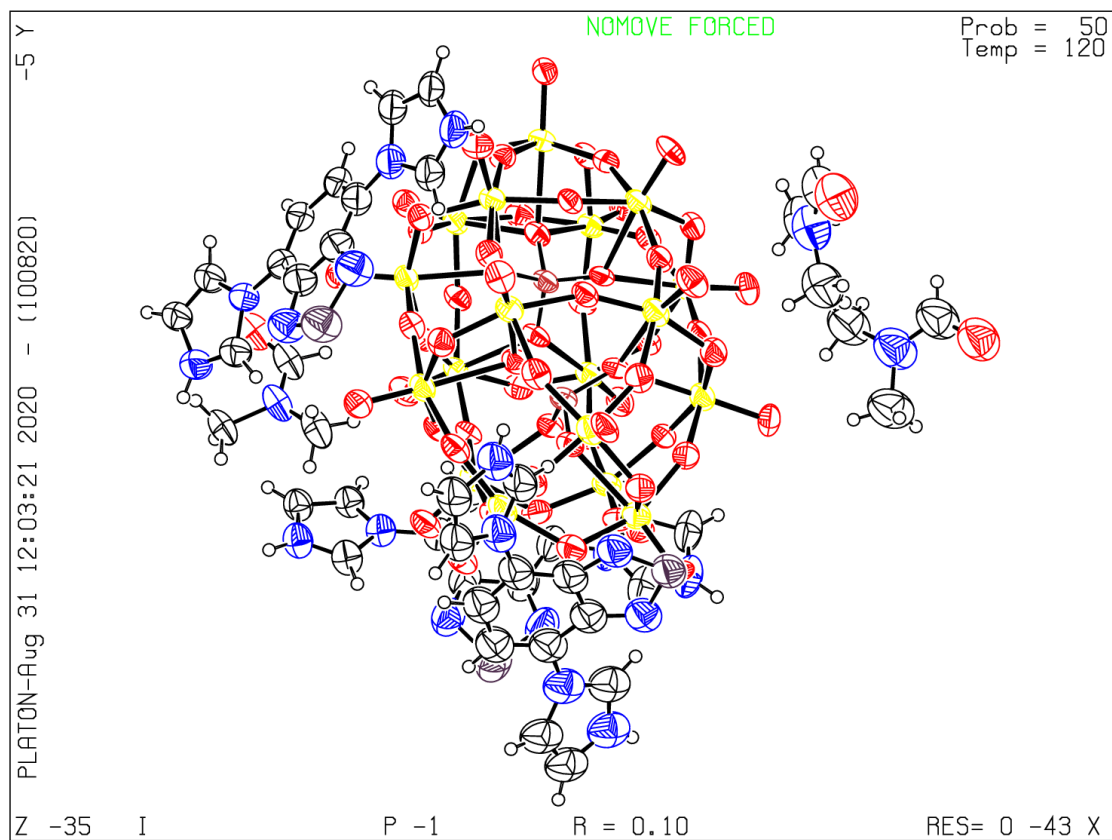

Supplement: Supplementary file 2 [file Data_Sheet_1.PDF]
